# Supplementary material
Source: ML conference proceedings conference paper supplement (https://openaccess.thecvf.com/content/CVPR2024/html/Zhai_Physical_Property_Understanding_CVPR_2024_paper.html)
Supplement: Supplementary file 1 [file Zhai_Physical_Property_Understanding_CVPR_2024_supplemental.zip]

Archive with 3 entries (3 files):
- README.md
- supp.mp4
- supp.pdf
