# Supplementary material
Source: ML conference proceedings conference paper supplement (https://openaccess.thecvf.com/content/CVPR2024/html/Zhai_Physical_Property_Understanding_CVPR_2024_paper.html)
Supplement: Supplementary file 1 [file Zhai_Physical_Property_Understanding_CVPR_2024_supplemental.zip › README.md]

## Supplementary Material

We provide additional experimental details and qualitative results in `supp.pdf`.

We provide a video with a summary of our method and additional visualizations in `supp.mp4`. The video is encoded using an h264 (avc1) codec.
